# Supplementary material
Source: MDPI journal article supplement (https://www.mdpi.com/2078-2489/13/9/410)
Supplement: s1 [file s1]

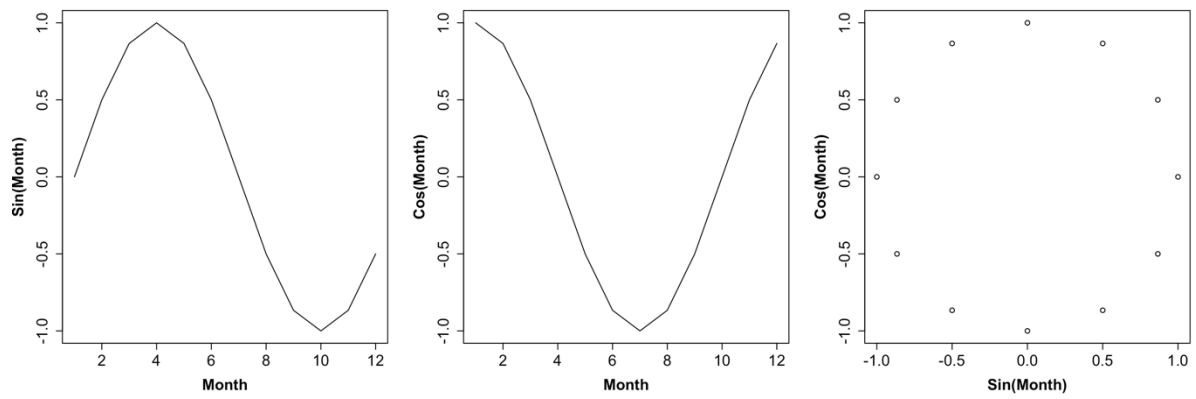

**Figure S1.** Visualization of sine and cosine transform of Month.

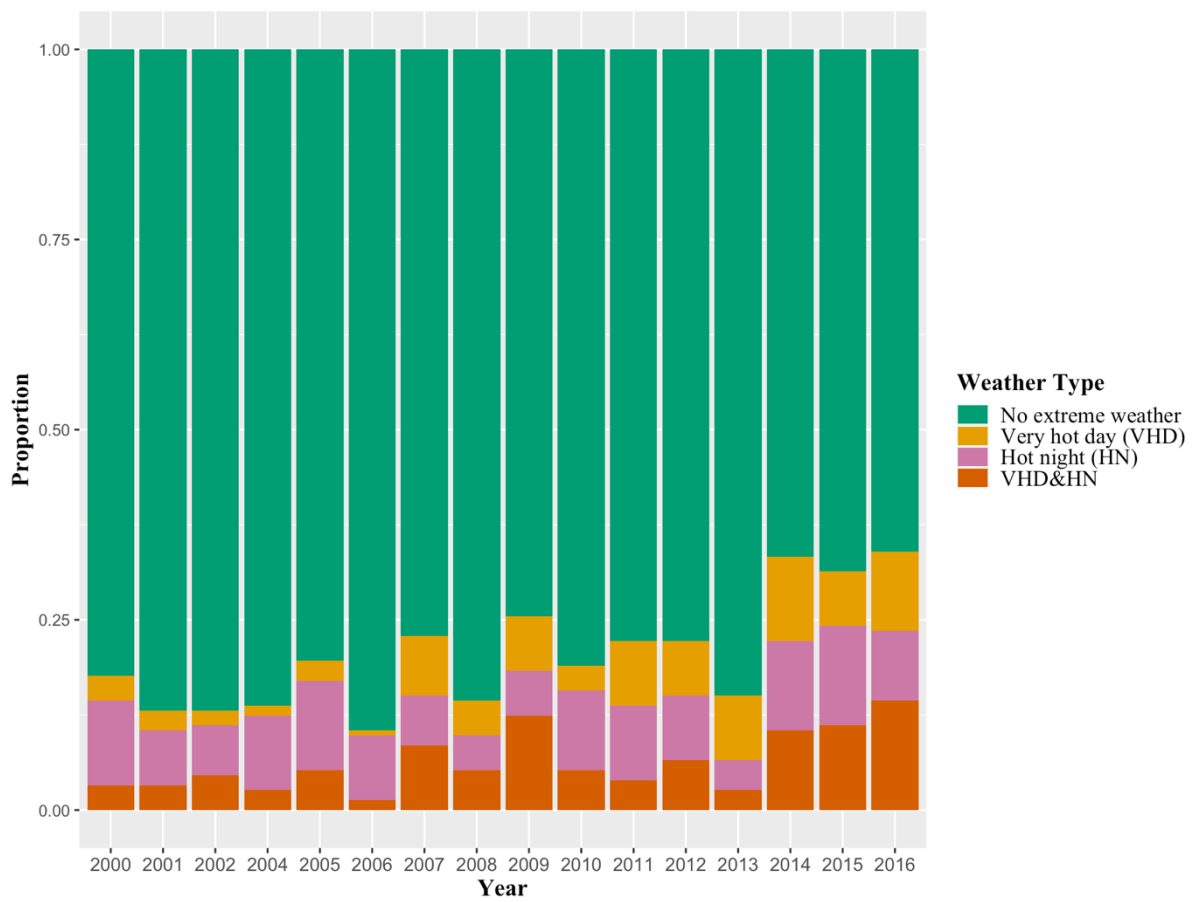

**Figure S2.** Frequency of VHD and HN in hot season from 2000 to 2016.

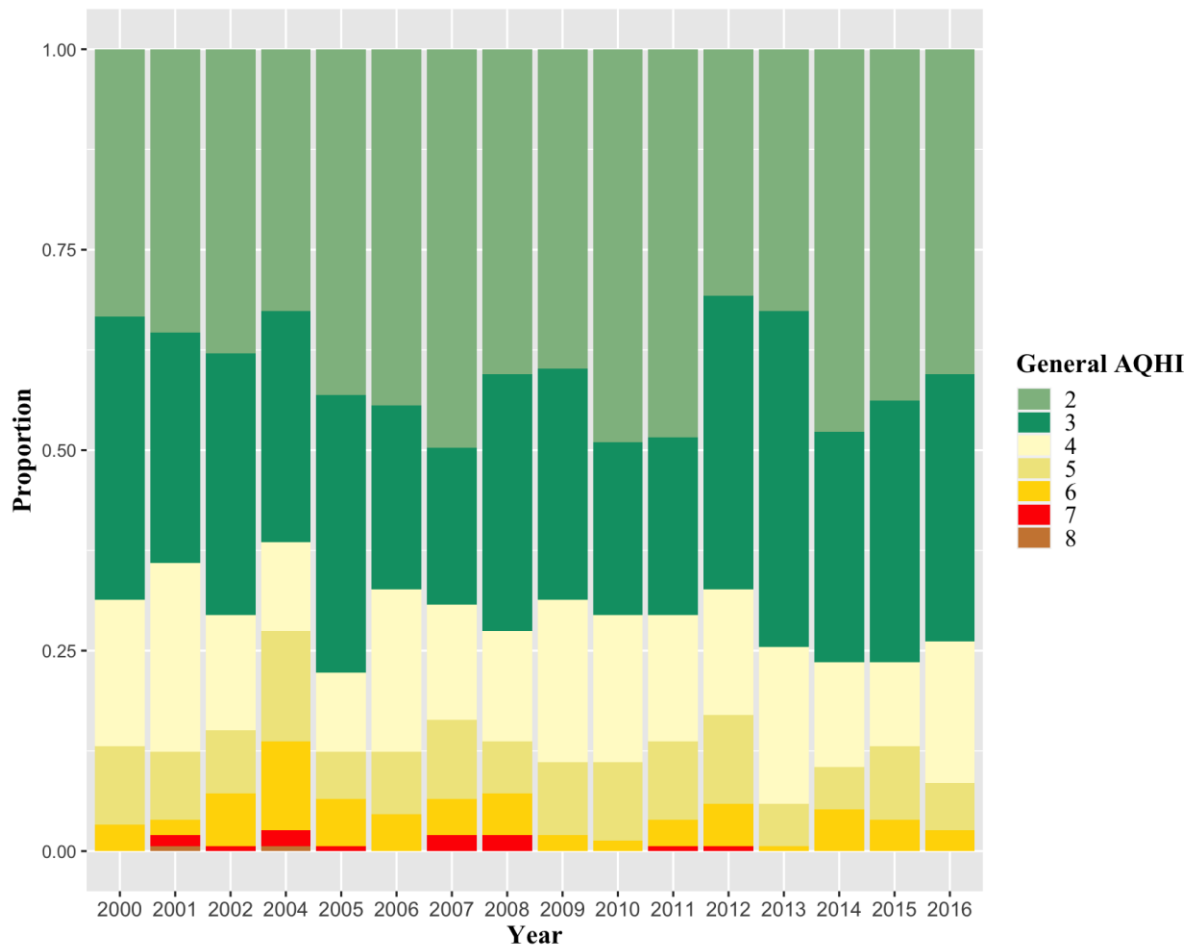

**Figure S3.** Frequency of general AQHI in hot season from 2000 to 2016.

**Table S1:** A summary of potential predictors used in developing the prediction models.

| Potential predictor                      | Lag (in days) | Models involved                                                                                                  |
|------------------------------------------|---------------|------------------------------------------------------------------------------------------------------------------|
| ED attendance rates of the previous days | 1-14          | LR(model 1,2,3), Decision tree, SVM, Random forest, DNN, GRU                                                     |
| General AQHI                             | 1-14          | LR(model 1,2,3), Decision tree, SVM, Random forest, DNN, GRU                                                     |
| Maximum daily temperatures               | 1-14          | LR(model 2) <sup>#</sup> , Decision tree <sup>#</sup> , SVM <sup>#</sup> , Random forest <sup>#</sup> , DNN, GRU |
| Mean daily temperatures                  | 1-14          | LR(model 2) <sup>#</sup> , Decision tree <sup>#</sup> , SVM <sup>#</sup> , Random forest <sup>#</sup> , DNN, GRU |
| Minimum daily temperatures               | 1-14          | LR(model 2) <sup>#</sup> , Decision tree <sup>#</sup> , SVM <sup>#</sup> , Random forest <sup>#</sup> , DNN, GRU |
| Very Hot Day                             | 1-14          | LR(model 3) <sup>#</sup> , DNN, GRU                                                                              |
| Hot Night                                | 1-14          | LR(model 3) <sup>#</sup> , DNN, GRU                                                                              |

|                                       |      |                                                    |
|---------------------------------------|------|----------------------------------------------------|
| Transformed month and week indicators | 0    | LR(model 1,2,3), Decision tree, SVM, Random forest |
|                                       | 1-14 | DNN, GRU                                           |
| Holiday indicator                     | 0    | LR(model 1,2,3), Decision tree, SVM, Random forest |
|                                       | 1-14 | DNN, GRU                                           |

# The selected variables from LASSO were listed in Table 1.

LR denotes linear regression, SVM denotes support vector machine, DNN denotes deep neural network, and GRU denotes gated recurrent unit.
